# Supplementary material for: Data on the elemental composition (mobile fractions and totalcontent) of soils in catena at the SE Valdai Hills, Russia
Source: Copernicus journal article supplement (doi:10.5194/essd-2020-309), 2021-01-26
Supplement: Supplementary file 2 [file essd-2020-309-supplement.zip]

Supplement of

## **Data on the elemental composition (mobile fractions and total content) of soils in catena at the SE Valdai Hills, Russia**

Enchilik P.R., Semenov I.N., Kasimov N.S.

Correspondence to: Enchilik Polina ((polimail@inbox.ru)

- Table S1 Descriptive Statistics (seasons, landscapes, hohizons).xlsx
- Table S2 Significance of Seasonality differences.xlsx
- Table S3 Descriptive Statistics (9 spatial replicates).xlsx
- Table S4 Vertical distribution (R).xlsx
- Table S5 Spatial distribution (L).xlsx
- Table S6 Significance of L differences.xlsx
- Table S7.1 The correlation between elemental composition of soils, physical and chemical properties of soils.xlsx
- Table S7.2 The correlation between total concentration and concentration of mobile forms of chemical elements in soils.xlsx
- Table S8 Relative error.xlsx
