# Supplementary material for: Data on the elemental composition (mobile fractions and totalcontent) of soils in catena at the SE Valdai Hills, Russia
Source: Copernicus journal article supplement (doi:10.5194/essd-2020-309), 2021-01-26
Supplement: Supplementary file [file essd-2020-309-AC1-supplement.pdf]

## Response to Reviewer # 1

We thank Reviewer #1 for thoughtful and supportive comments.

We revised the manuscript. And we hope that the revised version of the manuscript became better.

| Comment                                                                                                                                                                                                | Response                                                                                                                                                    |
|--------------------------------------------------------------------------------------------------------------------------------------------------------------------------------------------------------|-------------------------------------------------------------------------------------------------------------------------------------------------------------|
| First, scientific English language is below any standards in this paper. The authors should ask a native English speaker or a professional translator to revise the text.                              | The revised version of the manuscript was corrected by a professional translator and by a native speaker.                                                   |
| Second, there are some disappointing mistakes in soil classification                                                                                                                                   | Thank to Professor Gerasimova, the names of soils studied were corrected professionally.                                                                    |
| Table 1, the first soil: Stagnic should go before Glossic, Profondic is a secondary qualifier, and thus should go after the name of the RG.                                                            | We have corrected the name of the first soil. The corrected name is Endocalcaric Albic Neocambic Stagnic Glossic Retisols (Geoabruptic, Chromic, Loamic).   |
| Table 1, the second soil: Stagnic should go before Glossic, Profondica is a secondary qualifies, and the soil should be either Ochric or Himic, but not both of them.                                  | We have corrected the name of the second soil. The corrected name is Endocalcaric Albic Neocambic Stagnic Glossic Retisols (Geoabruptic, Ochric, Lamellic). |
| Table 1, the forth soil: Profondic is a secondary qualifier.                                                                                                                                           | We have corrected the name of the forth soil. The corrected name is Endocalcaric Glossic Albic Histic Stagnosols (Geoabruptic).                             |
| Table 1, the fifth column: please change all the commas to decimal points                                                                                                                              | We have changed all the commas to decimal points in fifth column.                                                                                           |
| Table 1, the sixth column: prism-like structure does not exist in any international classification, though I can imagine what You mean. Please refer to FAO or USDA manuals for field soil description | In sixth column, we have replaced prism-like structure with prismatic structure.                                                                            |
| Figures 2 and 3: please try to follow internationally accepted terminology. I do not understand the expression "upper slope". Do You mean shoulder or backslope position?                              | We have replaced «upper slope» with «backslope» in figures 2 and 3 and throughout the text.                                                                 |

|                                                                                                     |                                                                                                                |
|-----------------------------------------------------------------------------------------------------|----------------------------------------------------------------------------------------------------------------|
| <p>May we regard "upper footslope" and "lower footslope" as footslope and toeslope accordingly?</p> | <p>We have replaced «upper footslope» and "lower footslope" with «footslope» and «toeslope», respectively.</p> |
|-----------------------------------------------------------------------------------------------------|----------------------------------------------------------------------------------------------------------------|
